# Supplementary material for: Possible controls on Arctic clouds by natural aerosols from long-range transport of biogenic emissions and ozone depletion events
Source: Copernicus journal article supplement (doi:10.5194/acp-2022-95), 2022-02-15
Supplement: Supplementary file 1 [file acp-2022-95-supplement.pdf]

# Supplement for

## Possible controls on Arctic clouds by natural aerosols from long-range transport of biogenic emissions and ozone depletion events

Rupert Holzinger<sup>1</sup>, Oliver Eppers<sup>2,3</sup>, Kouji Adachi<sup>4</sup>, Heiko Bozem<sup>2</sup>, Markus Hartmann<sup>5,a</sup>, Andreas Herber<sup>6</sup>, Makoto Koike<sup>7</sup>, Dylan B. Millet<sup>8</sup>, Nobuhiro Moteki<sup>7</sup>, Sho Ohata<sup>7,b,c</sup>, Frank Stratmann<sup>5</sup>, Atsushi Yoshida<sup>7,d</sup>

<sup>1</sup>Institute for Marine and Atmospheric Research, Utrecht (IMAU), Utrecht University, The Netherlands

<sup>2</sup>Johannes Gutenberg University of Mainz, Institute for Atmospheric Physics, Mainz, Germany

<sup>3</sup>Particle Chemistry Department, Max Planck Institute for Chemistry, Mainz, Germany

<sup>4</sup>Department of Atmosphere, Ocean, and Earth System Modeling Research, Meteorological Research Institute, Tsukuba, Japan

<sup>5</sup>Atmospheric Chemistry Department (ACD), Leibniz-Institute for Tropospheric Research (TROPOS), Leipzig, Germany

<sup>6</sup>Alfred Wegener Institute Helmholtz Centre for Polar and Marine Research (AWI), Bremerhaven, Germany

<sup>7</sup>Department of Earth and Planetary Science, Graduate School of Science, The University of Tokyo, Tokyo, Japan

<sup>8</sup>University of Minnesota, Saint Paul, MN, USA

<sup>a</sup>now at: Atmospheric Science, Department of Chemistry and Molecular Biology, University of Gothenburg, Gothenburg, Sweden

<sup>b</sup>now at: Institute for Space–Earth Environmental Research, Nagoya University, Nagoya, Aichi, Japan

<sup>c</sup>now at: Institute for Advanced Research, Nagoya University, Nagoya, Aichi, Japan

<sup>d</sup>now at: National Institute of Polar Research, Tokyo, Japan

*Correspondence to:* Rupert Holzinger (r.holzinger@uu.nl)

Table S1: Campaign (n=7771) mean, median, 25%, and 75% percentiles for all detected signals that were above the limit of  
35 detection for at least 3% of all measurements.

| m/Q    | possible attribution                      | mean | med | p25  | p75 |
|--------|-------------------------------------------|------|-----|------|-----|
| 27.021 |                                           | 2.4  | 1.9 | -6.9 | 11  |
| 33.021 | methanol                                  | 191  | 171 | 130  | 230 |
| 34.019 | methanol                                  | 17   | 15  | -11  | 44  |
| 41.031 |                                           | 51   | 43  | 34   | 52  |
| 42.025 | acetonitrile                              | 20   | 20  | 9.0  | 31  |
| 43.011 |                                           | 42   | 38  | 28   | 48  |
| 44.989 | acetaldehyde                              | 354  | 321 | 164  | 487 |
| 45.987 | NO <sub>2</sub> <sup>+</sup> , mostly PAN | 78   | 75  | 59   | 92  |
| 47.013 | formic acid                               | 29   | 27  | -3.1 | 56  |
| 48.981 |                                           | 0.9  | 0.9 | -2.0 | 3.6 |
| 49.014 |                                           | 0.8  | 0.7 | -2.3 | 3.7 |
| 51.001 |                                           | 1.6  | 1.6 | -1.9 | 5.0 |
| 55.041 |                                           | 18   | 13  | 4.7  | 23  |
| 56.051 |                                           | 2.1  | 1.9 | -0.9 | 4.8 |
| 57.023 |                                           | 4.9  | 1.9 | -2.6 | 6.2 |
| 57.065 |                                           | 39   | 32  | 25   | 41  |
| 58.033 |                                           | 3.7  | 3.4 | 0.7  | 6.1 |
| 59.05  | acetone                                   | 561  | 523 | 434  | 658 |
| 59.99  |                                           | 1.1  | 1.1 | -1.4 | 3.7 |
| 60.049 | acetone                                   | 18   | 18  | 13   | 23  |
| 61.03  | acetic acid                               | 16   | 15  | 4.7  | 26  |
| 62.03  |                                           | 2.3  | 1.5 | -1.1 | 4.3 |
| 63.009 | DMS                                       | 10   | 8.9 | 1.7  | 16  |
| 63.984 |                                           | 0.9  | 0.9 | -1.9 | 3.6 |

|         |                |     |     |       |     |
|---------|----------------|-----|-----|-------|-----|
| 65.019  |                | 3.2 | 3.1 | 0.7   | 5.7 |
| 66.964  |                | 0.7 | 0.7 | -1.4  | 2.8 |
| 67.056  |                | 1.5 | 0.7 | -1.4  | 3.0 |
| 69.069  | isoprene       | 15  | 12  | 7.3   | 17  |
| 70.078  |                | 0.9 | 0.8 | -1.3  | 3.0 |
| 71.053  |                | 4.5 | 2.4 | -0.6  | 5.4 |
| 73.062  | MEK            | 118 | 105 | 89    | 139 |
| 74.033  |                | 4.3 | 4.2 | 1.5   | 6.9 |
| 75.043  | propionic acid | 9.2 | 8.9 | 5.7   | 12  |
| 76.94   |                | 0.3 | 0.3 | -1.7  | 2.2 |
| 77.023  |                | 1.2 | 1.1 | -0.8  | 3.2 |
| 79.055  | benzene        | 63  | 62  | 57    | 67  |
| 80.059  |                | 4.3 | 4.1 | 2.2   | 6.2 |
| 80.991  |                | 13  | 13  | 10    | 15  |
| 81.062  |                | 3.8 | 2.9 | 0.8   | 4.9 |
| 82.959  |                | 6.7 | 6.6 | 4.5   | 8.7 |
| 83.081  |                | 7.9 | 6.0 | 3.0   | 9.2 |
| 84.946  |                | 1.1 | 1.2 | -0.9  | 3.2 |
| 84.967  |                | 0.4 | 0.5 | -1.7  | 2.6 |
| 85.056  |                | 1.5 | 0.8 | -1.9  | 3.5 |
| 87.055  | pentanone      | 16  | 14  | 10    | 20  |
| 88.064  |                | 1.0 | 0.9 | -1.1  | 2.9 |
| 91.043  |                | 3.1 | 1.8 | -10.6 | 14  |
| 93.07   | toluene        | 10  | 8.4 | 5.7   | 11  |
| 95.044  |                | 2.2 | 1.2 | -1.5  | 3.8 |
| 96.998  |                | 1.5 | 1.6 | -2.1  | 5.0 |
| 97.094  |                | 3.8 | 2.4 | -1.0  | 6.0 |
| 99.019  |                | 3.6 | 3.4 | 0.6   | 6.2 |
| 99.076  |                | 2.1 | 1.8 | -0.7  | 4.3 |
| 100.947 |                | 11  | 11  | 7.6   | 14  |

|         |  |     |     |      |     |
|---------|--|-----|-----|------|-----|
| 101.033 |  | 2.7 | 2.4 | -1.5 | 6.3 |
| 102.948 |  | 5.8 | 5.9 | 1.2  | 11  |
| 104.948 |  | 1.5 | 1.4 | -1.0 | 3.9 |
| 105.049 |  | 1.0 | 0.4 | -1.4 | 2.3 |
| 105.941 |  | 5.6 | 5.4 | -2.1 | 13  |
| 106.07  |  | 0.7 | 0.4 | -2.9 | 3.9 |
| 106.946 |  | 4.5 | 3.6 | -4.1 | 12  |
| 107.047 |  | 2.4 | 0.4 | -5.6 | 6.6 |
| 107.953 |  | 8.4 | 7.9 | -10  | 25  |
| 108.072 |  | 1.9 | 0.2 | -11  | 12  |
| 109.089 |  | 4.8 | 3.7 | 0.8  | 7.0 |
| 111.113 |  | 5.6 | 4.5 | 1.5  | 7.7 |
| 112.111 |  | 0.6 | 0.5 | -1.2 | 2.2 |
| 113.041 |  | 0.9 | 0.8 | -1.4 | 3.0 |
| 113.112 |  | 1.1 | 1.0 | -1.0 | 3.0 |
| 115.05  |  | 2.6 | 2.4 | -0.1 | 5.0 |
| 116.911 |  | 56  | 56  | 52   | 60  |
| 118.928 |  | 52  | 52  | 47   | 57  |
| 120.085 |  | 0.6 | 0.2 | -2.5 | 3.3 |
| 120.941 |  | 16  | 16  | 13   | 19  |
| 121.065 |  | 4.7 | 1.6 | -1.1 | 4.2 |
| 121.958 |  | 1.8 | 1.7 | -0.4 | 3.8 |
| 122.091 |  | 1.4 | 1.1 | -0.6 | 2.8 |
| 122.959 |  | 2.0 | 2.0 | 0.1  | 3.8 |
| 123.097 |  | 1.4 | 0.9 | -0.9 | 2.8 |
| 124.957 |  | 1.8 | 1.6 | -2.0 | 5.4 |
| 125.119 |  | 1.7 | 1.3 | -0.9 | 3.6 |
| 129.087 |  | 0.7 | 0.4 | -1.7 | 2.4 |
| 134.944 |  | 0.7 | 0.7 | -1.0 | 2.4 |
| 135.084 |  | 3.2 | 1.1 | -1.1 | 3.3 |

|         |                |     |     |      |     |
|---------|----------------|-----|-----|------|-----|
| 137.123 | monoterpenes   | 1.4 | 1.0 | -0.7 | 2.7 |
| 138.119 |                | 0.2 | 0.2 | -1.4 | 1.7 |
| 139.129 | nopinone       | 0.6 | 0.3 | -1.4 | 2.1 |
| 141.085 |                | 0.6 | 0.4 | -1.2 | 2.0 |
| 143.109 |                | 1.2 | 0.7 | -1.2 | 2.8 |
| 149.054 |                | 1.8 | 1.0 | -1.1 | 3.1 |
| 151.131 |                | 0.6 | 0.3 | -1.4 | 2.2 |
| 153.098 |                | 0.4 | 0.3 | -1.3 | 1.9 |
| 159.093 |                | 1.0 | 0.9 | -1.3 | 3.1 |
| 160.909 |                | 0.5 | 0.4 | -1.3 | 2.2 |
| 161.097 |                | 1.3 | 0.9 | -1.9 | 3.8 |
| 165.157 |                | 0.6 | 0.4 | -1.3 | 2.1 |
| 175.102 |                | 0.5 | 0.3 | -1.4 | 2.1 |
| 177.167 |                | 1.4 | 1.0 | -1.6 | 3.9 |
| 179.179 |                | 0.7 | 0.5 | -1.1 | 2.1 |
| 180.937 |                | 1.3 | 1.1 | -0.6 | 2.9 |
| 181.079 |                | 0.5 | 0.5 | -1.3 | 2.2 |
| 182.939 |                | 1.1 | 1.0 | -0.6 | 2.7 |
| 205.184 | sesquiterpenes | 0.4 | 0.4 | -1.2 | 1.9 |
| 330.171 |                | 3.0 | 2.2 | -1.8 | 6.8 |
| 355.07  | D5             | 0.3 | 0.2 | -1.0 | 1.5 |
| 358.201 |                | 1.2 | 1.1 | -1.6 | 3.8 |

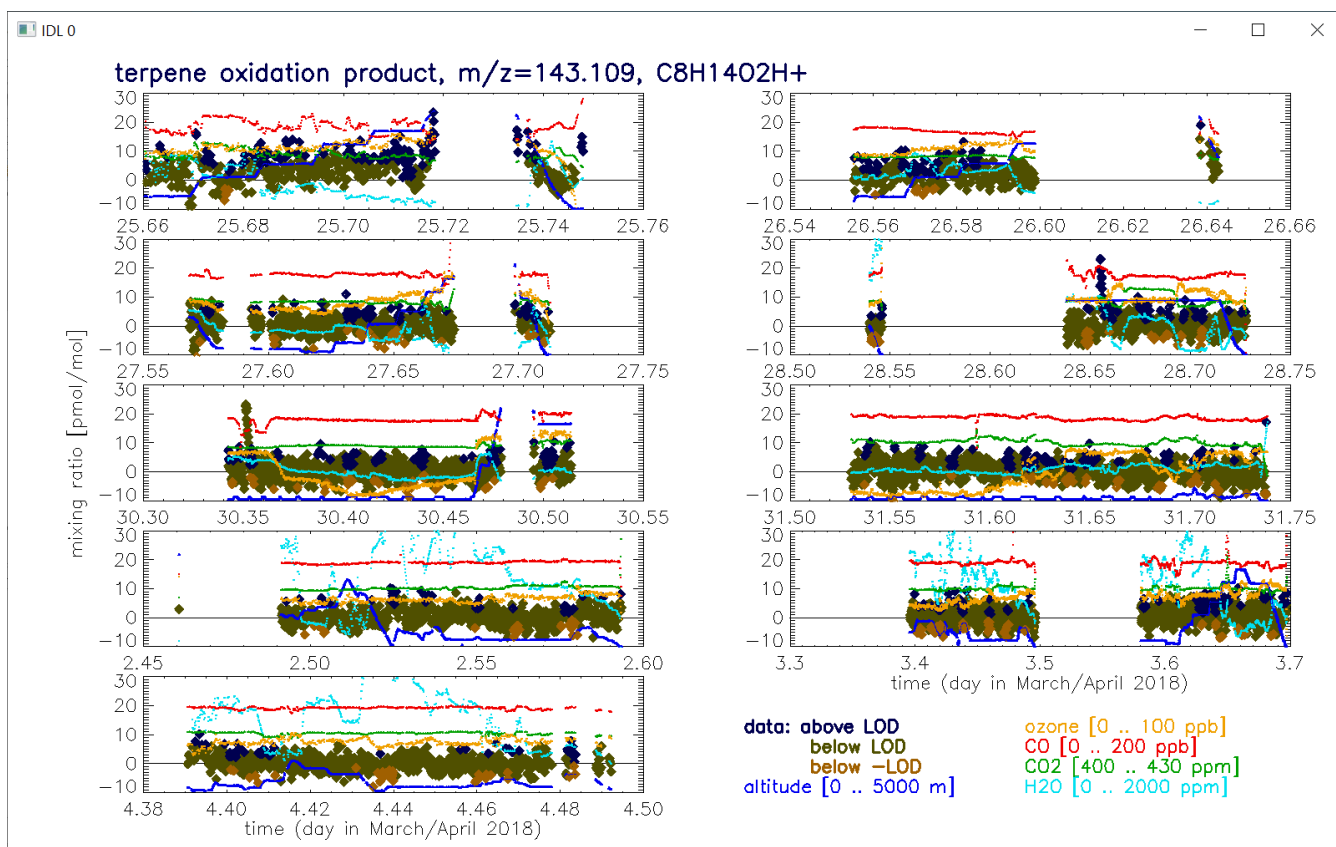

**Figure S1:** Data and presentation as in Figure 3 but for the signal detected at 143.109 Th. The campaign mean (median) mixing ratio was 1.2 (0.7) pmol/mol for this ion. Measured mixing ratios generally did not emerge above the LOD. The measurements plotted in black (n=812) were above the LOD, and values plotted in brown (n=315) were negative below -LOD. The fraction above LOD was calculated by subtracting the 'brown' points from the 'black' points and dividing the result by the total number of measurements (n=7771). The result is 6.4 % for this ion.

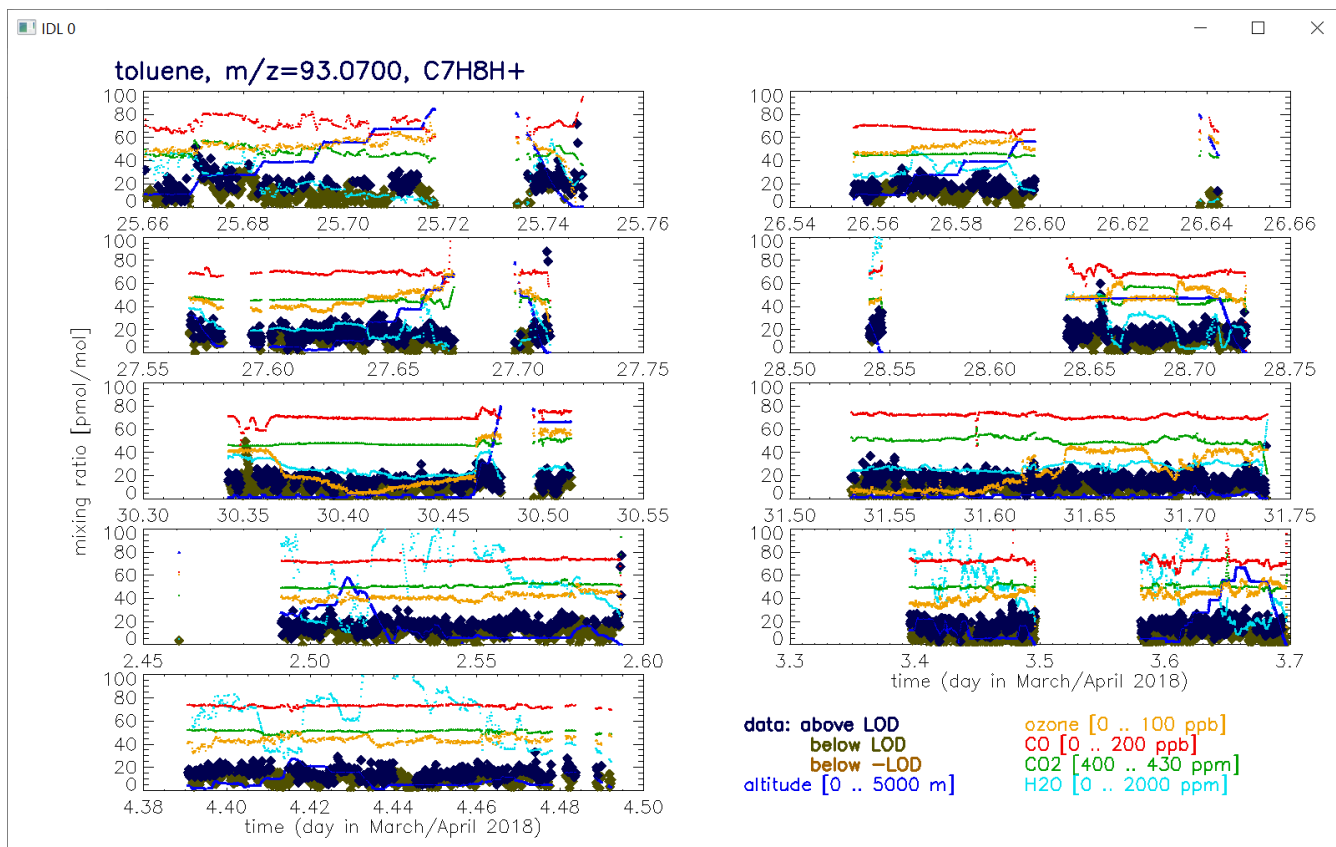

45 **Figure S2:** Data and presentation as in Figure 3 but for toluene.

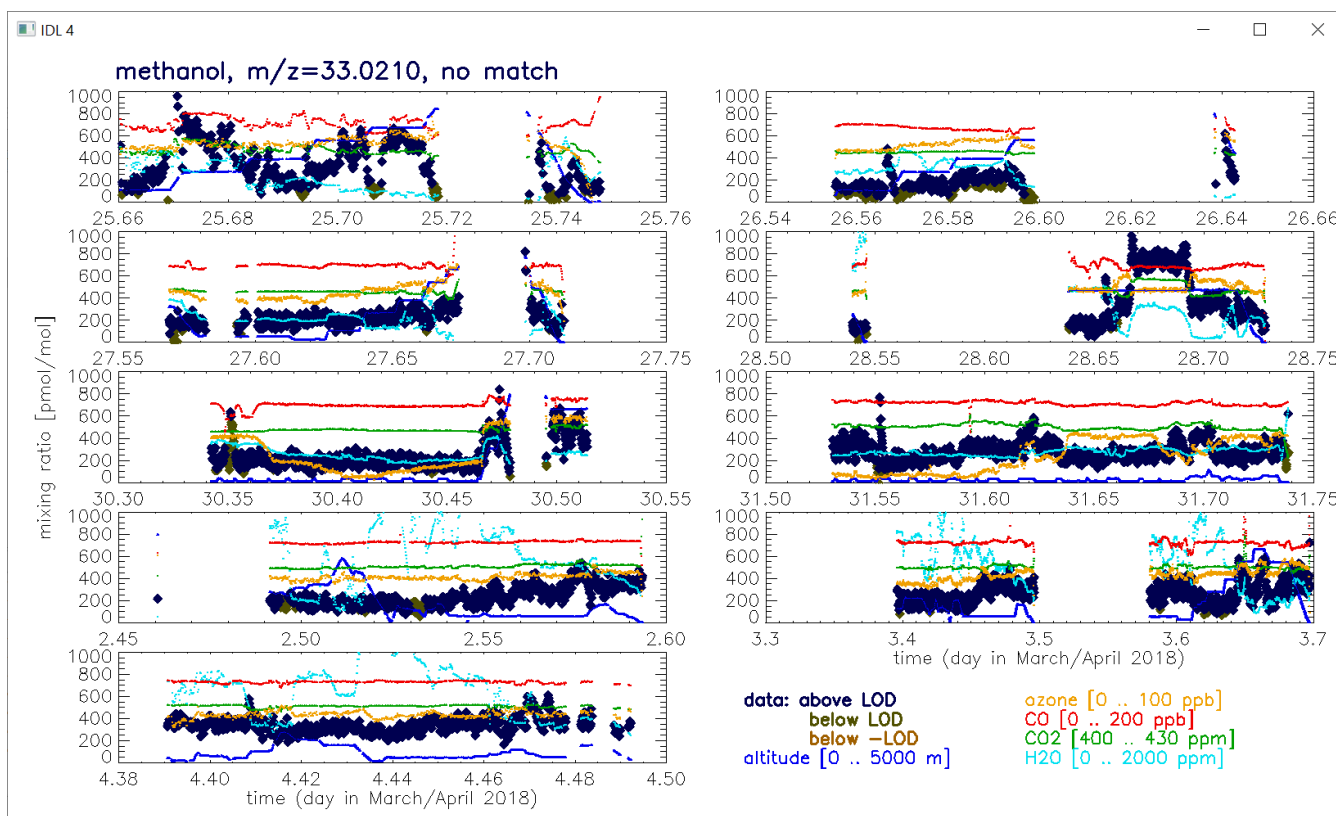

**Figure S3:** Data and presentation as in Figure 3 but for methanol.



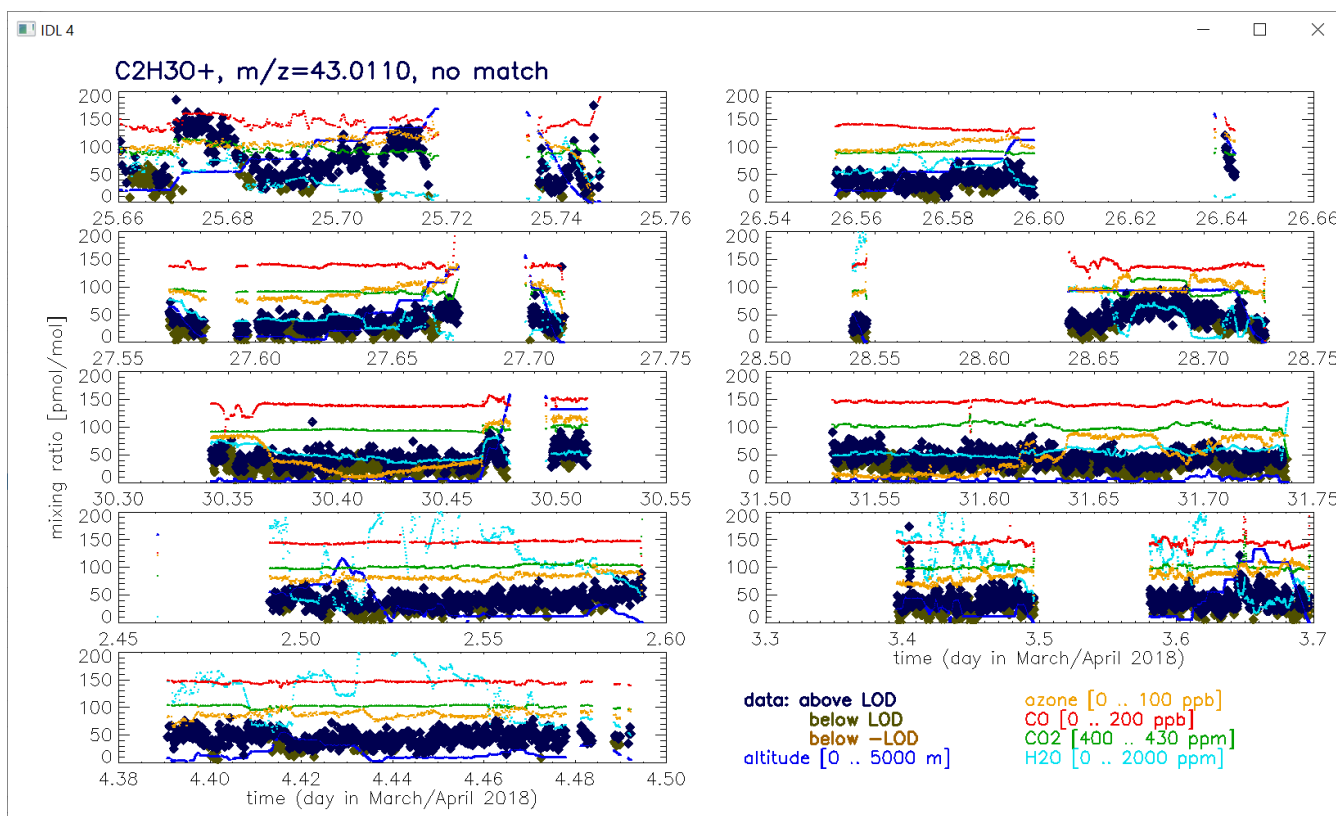

**Figure S4:** Data and presentation as in Figure 3 but for the signal detected at 43.011 Th.

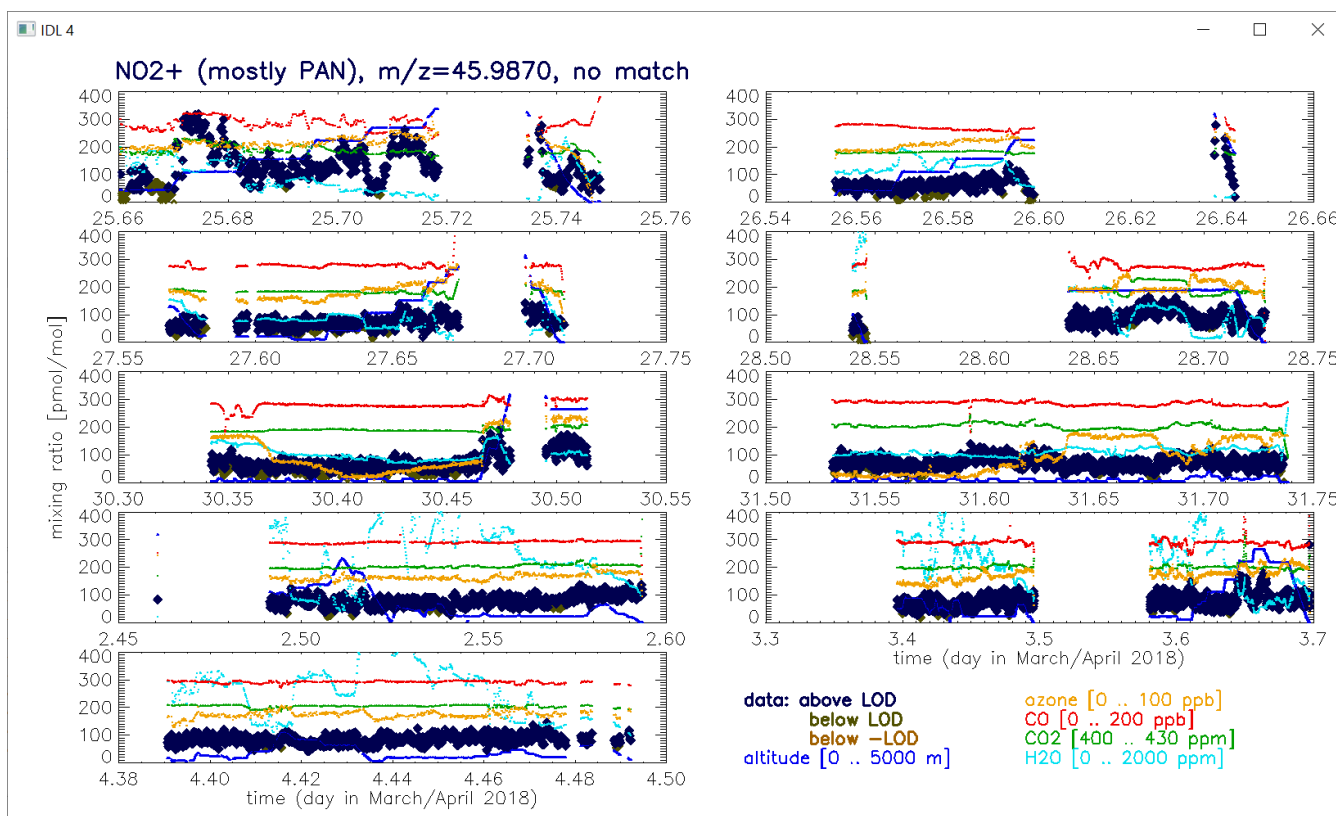

**Figure S5:** Data and presentation as in Figure 3 but for NO<sub>2</sub><sup>+</sup> (mostly attributed to PAN).

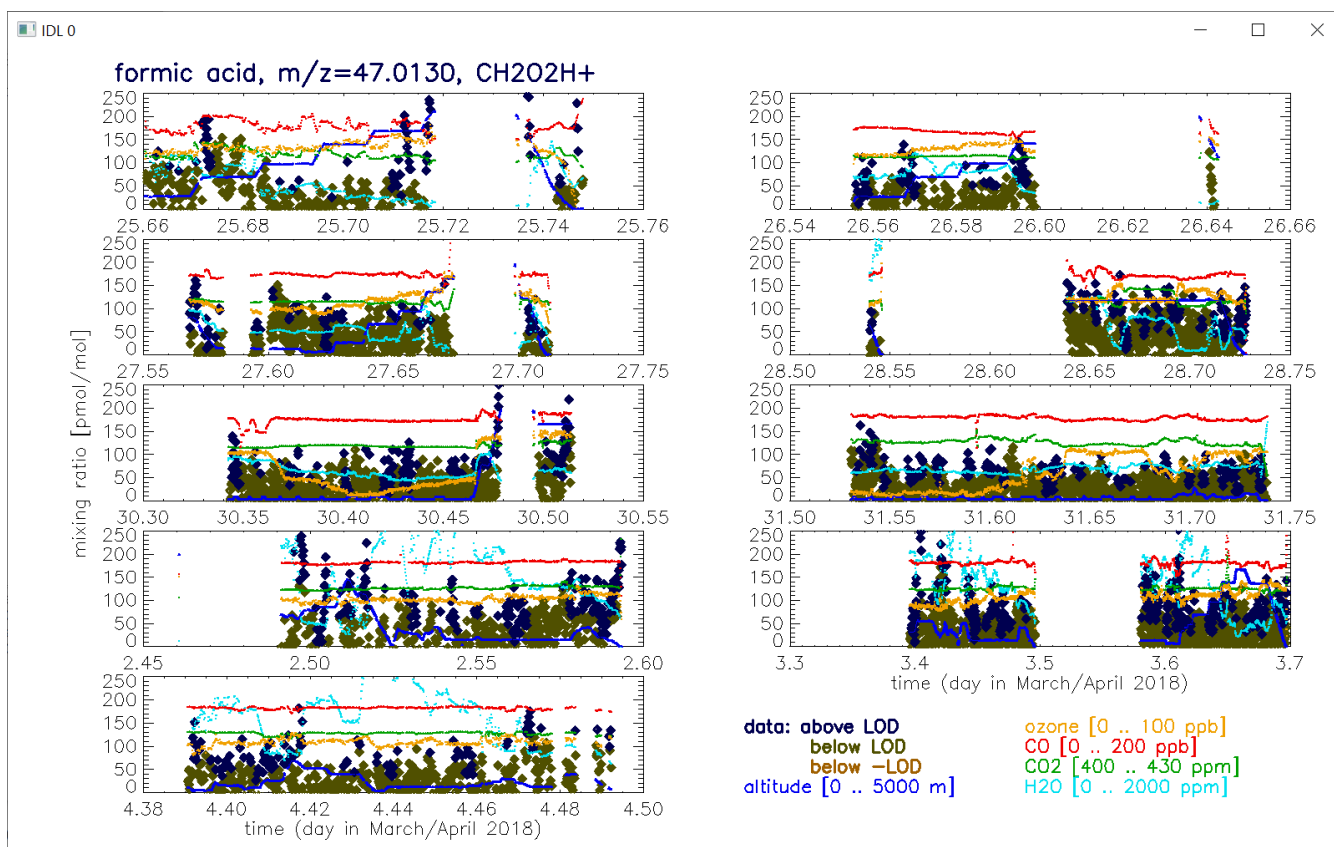

**Figure S6:** Data and presentation as in Figure 3 but for formic acid.

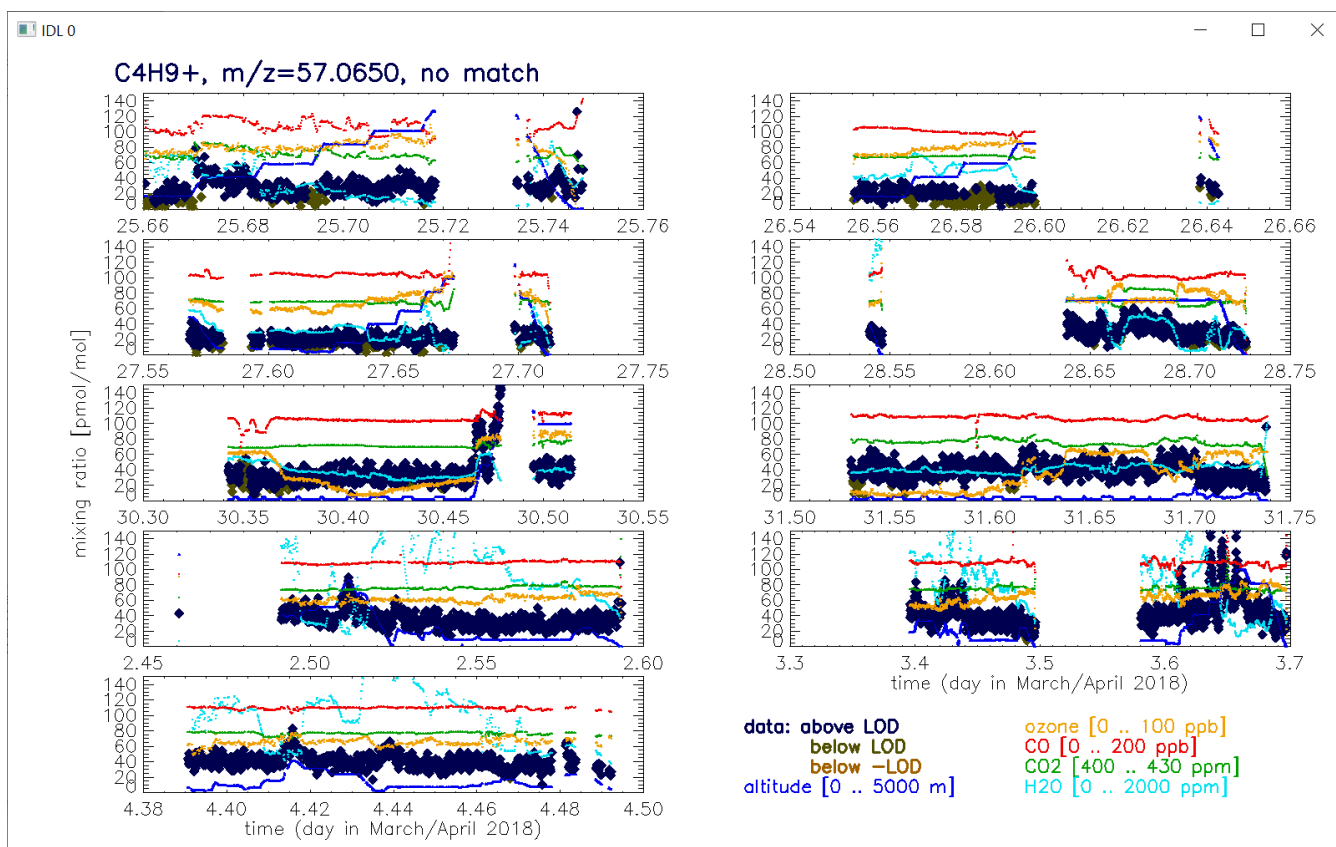

60 **Figure S7:** Data and presentation as in Figure 3 but for the signal detected at 57.065 Th.

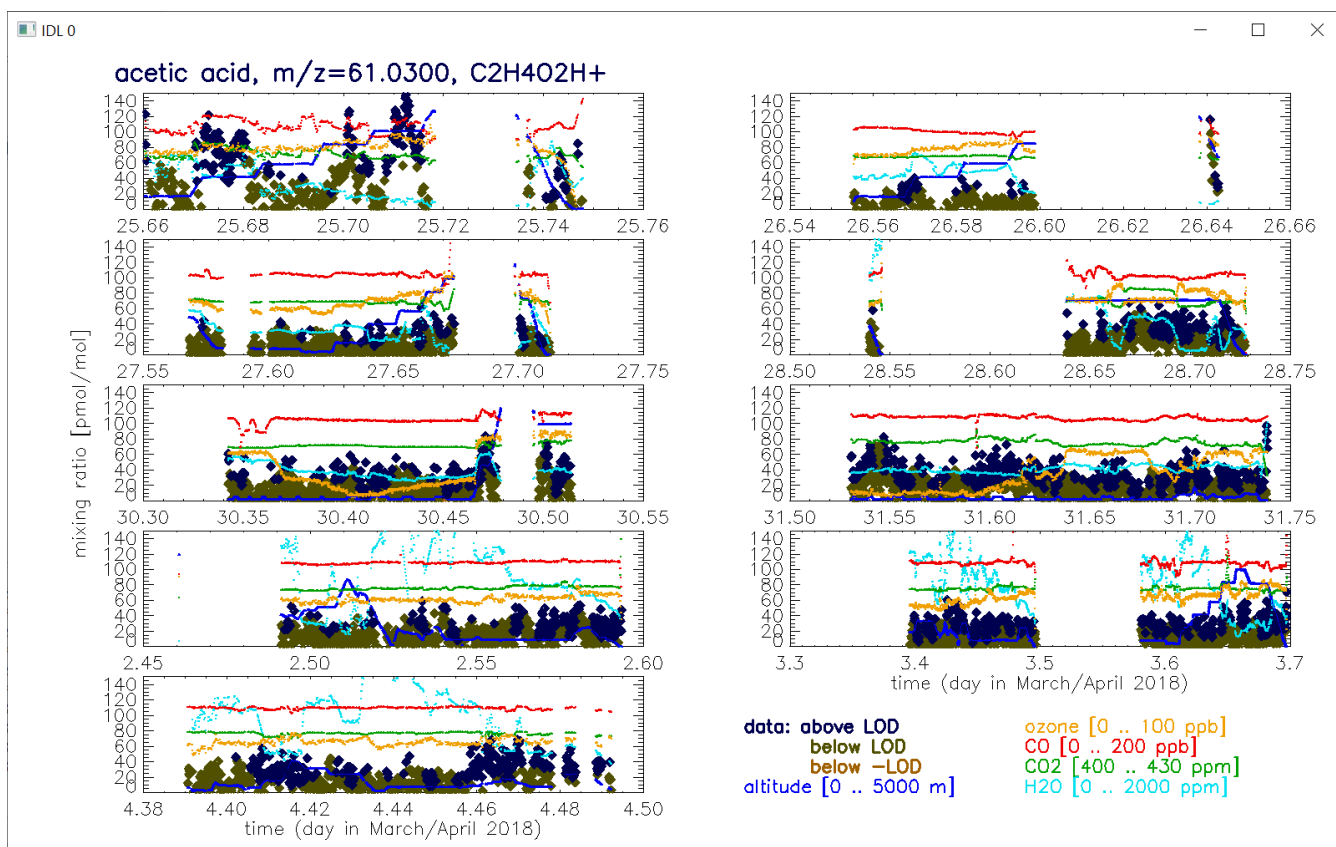

**Figure S8:** Data and presentation as in Figure 3 but for acetic acid.

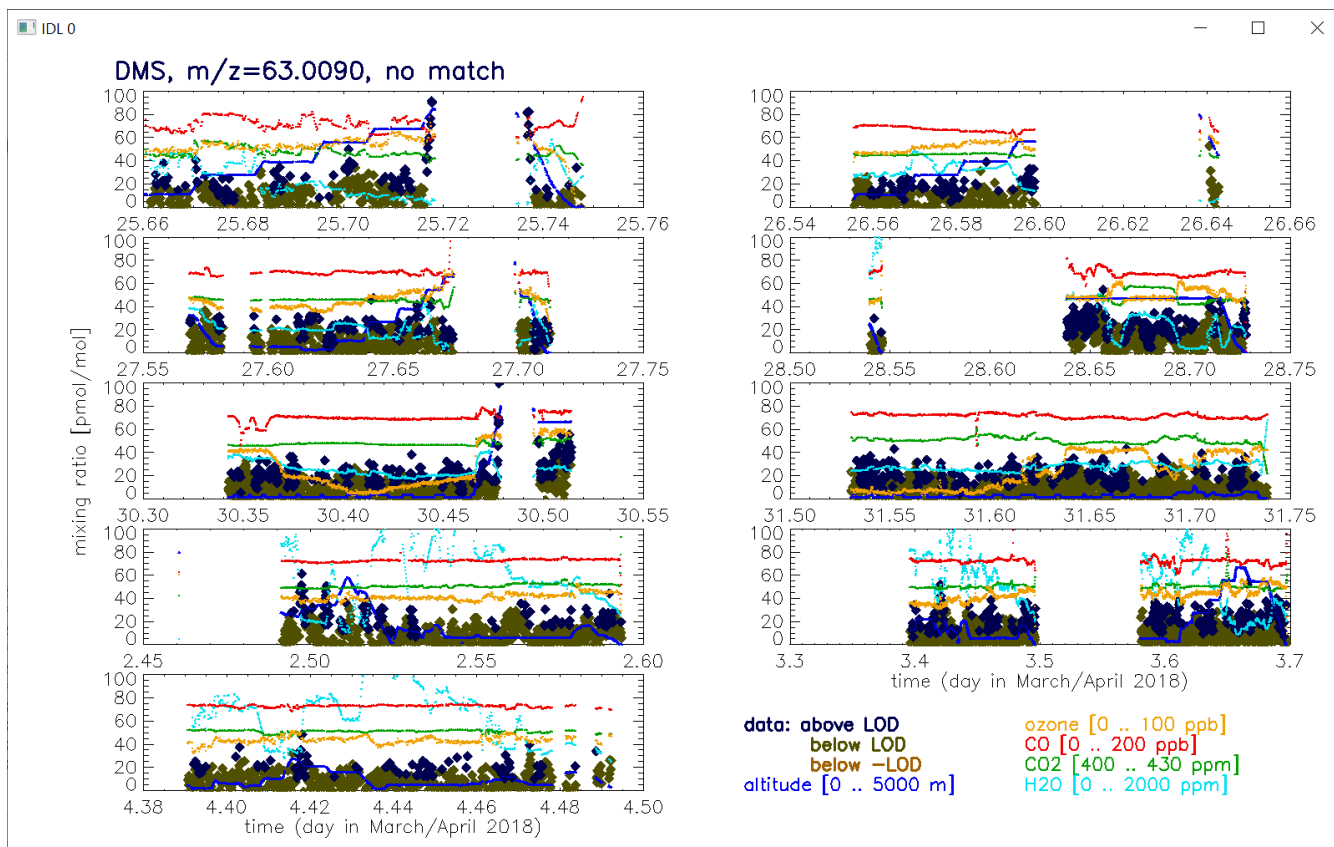

**Figure S9:** Data and presentation as in Figure 3 but for DMS.

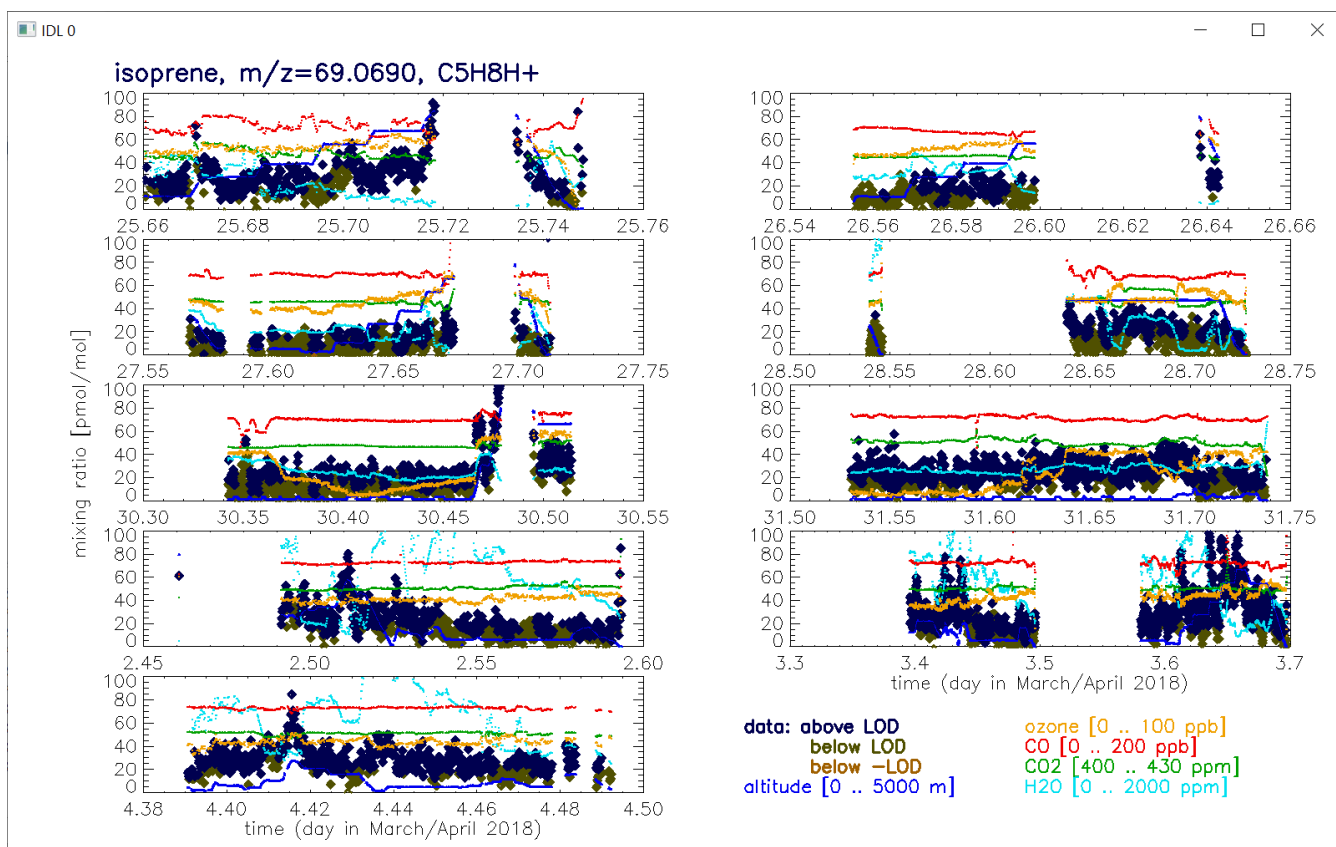

**Figure S10:** Data and presentation as in Figure 3 but for isoprene.

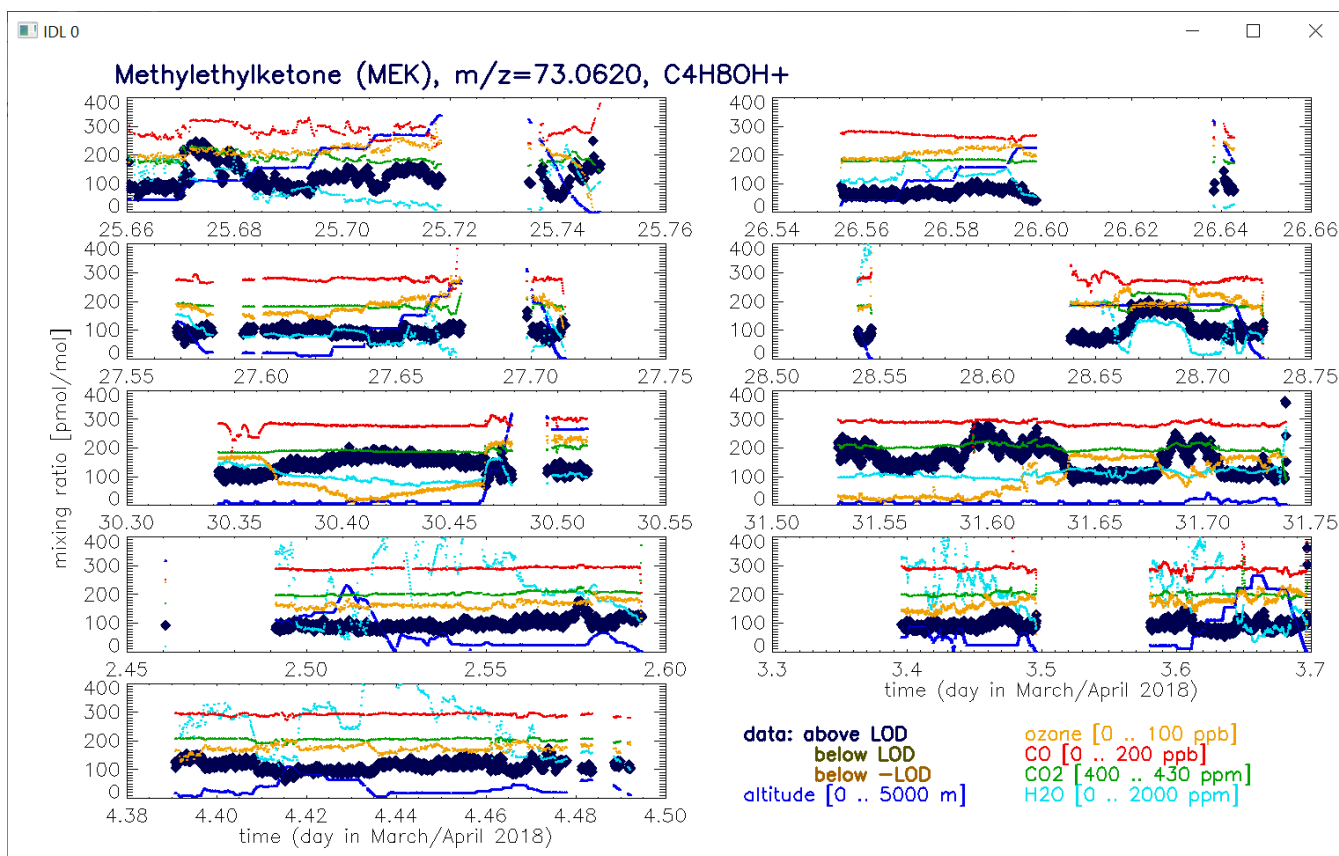

**Figure S11:** Data and presentation as in Figure 3 but for MEK.



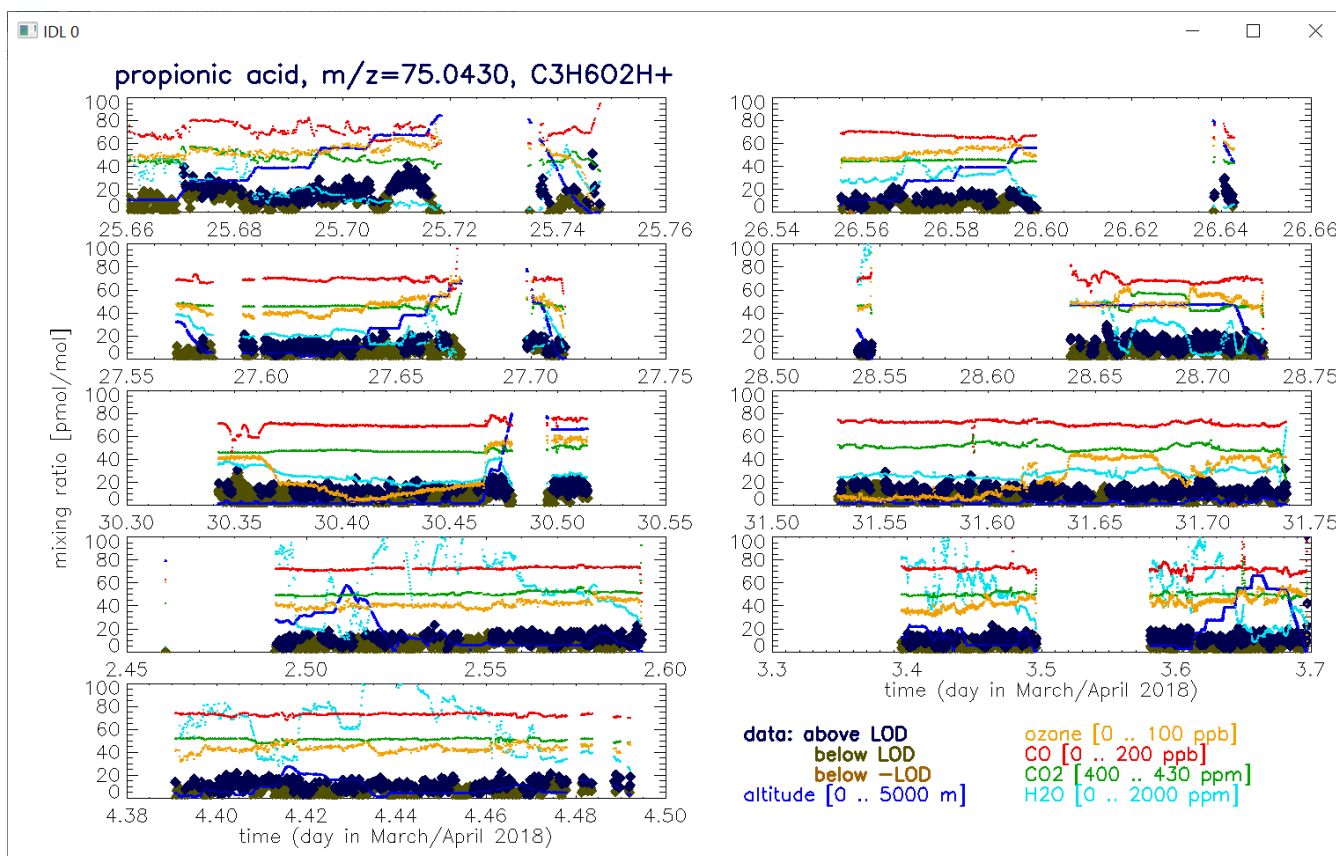

75 **Figure S12:** Data and presentation as in Figure 3 but for propionic acid.

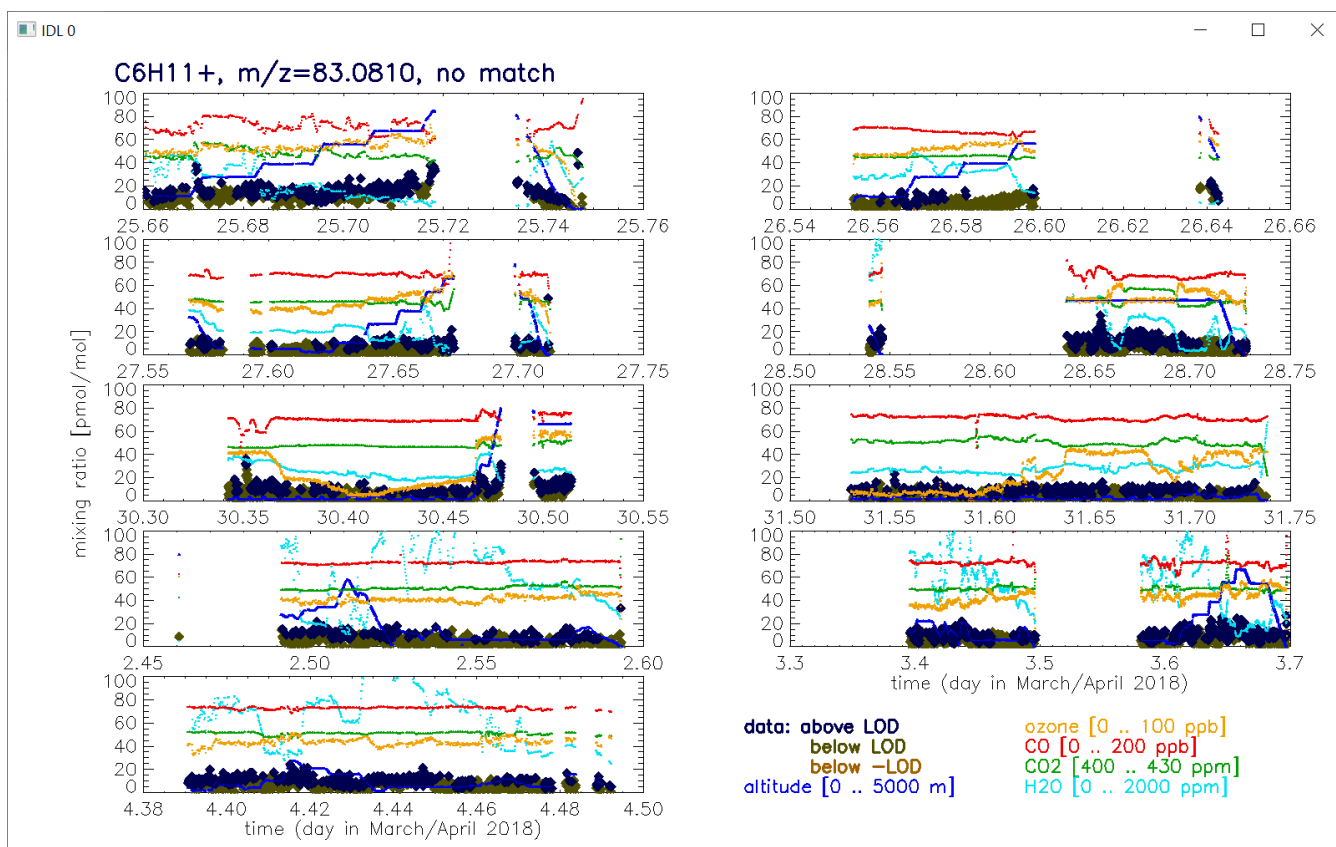

**Figure S13:** Data and presentation as in Figure 3 but for the signal detected at 83.081 Th.

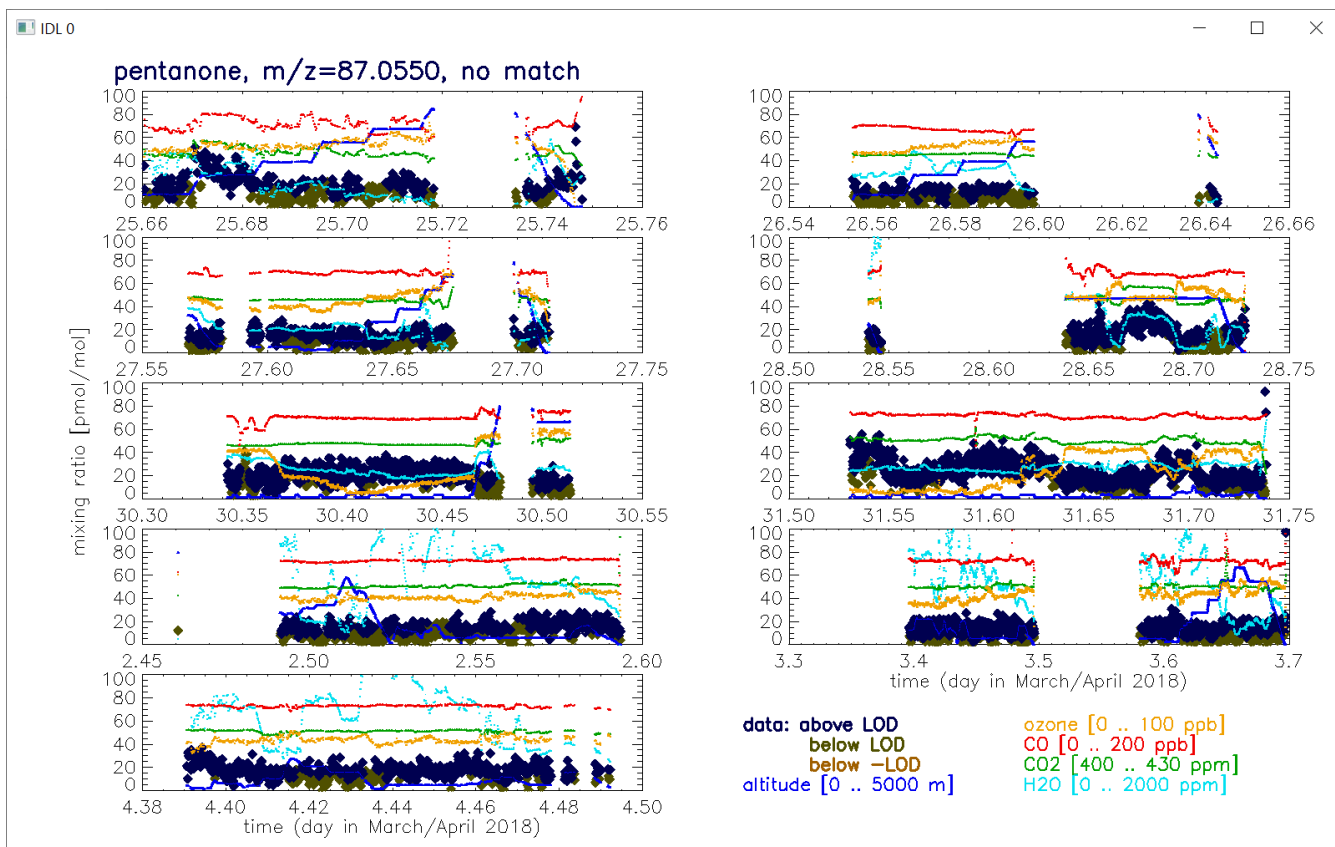

**Figure S14:** Data and presentation as in Figure 3 but for pentanone.
